1 Cross-sectional and longitudinal associations of smoking behavior with  
2 central arterial hemodynamic measures: The Framingham Heart Study

3 Leroy L. Cooper,<sup>1\*</sup> Sana Majid,<sup>2</sup> Na Wang,<sup>3</sup> Jessica L. Fetterman,<sup>2,4</sup> Joseph N. Palmisano,  
4 Emelia J. Benjamin,<sup>2,4,6,7,8</sup> Ramachandran S. Vasan,<sup>6,9,10</sup> Gary F. Mitchell,<sup>11</sup> and Naomi M.  
5 Hamburg<sup>2,4</sup>

6 <sup>1</sup>Biology Department, Vassar College, Poughkeepsie, New York, United States of America

7 <sup>2</sup>Evans Department of Medicine, Boston Medical Center, Boston, Massachusetts, United States  
8 of America

9 <sup>3</sup>Biostatistics and Epidemiology Data Analytics Center, Boston University School of Public  
10 Health, Boston, Massachusetts, United States of America

11 <sup>4</sup>Whitaker Cardiovascular Institute, Boston University Chobanian & Avedisian School of  
12 Medicine, Boston, Massachusetts, United States of America

13 <sup>5</sup>Department of Biostatistics, Boston University School of Public Health, Boston, Massachusetts

14 <sup>6</sup>Boston University and NHLBI's Framingham Study, Framingham, Massachusetts, United  
15 States of America

16 <sup>7</sup>Cardiology and Preventive Medicine Sections, Department of Medicine, Boston University  
17 Chobanian & Avedisian School of Medicine, Boston, Massachusetts, United States of America

18 <sup>8</sup>Department of Epidemiology, Boston University School of Public Health, Boston,  
19 Massachusetts, United States of America

20 <sup>9</sup>The University of Texas School of Public Health San Antonio, San Antonio, Texas, United  
21 States of America

22 <sup>10</sup>The University of Texas Health Science Center, San Antonio, Texas, United States of America

23 <sup>11</sup>Cardiovascular Engineering, Inc., Norwood, Massachusetts, United States of America

24 \*Corresponding author

25 E-mail: [lcooper@vassar.edu](mailto:lcooper@vassar.edu) (LLC)

## 26 **Abstract**

### 27 **Background**

28 Cigarette smoking is a leading modifiable cardiovascular disease risk factor. Cross-  
29 sectional studies demonstrated variable relations of smoking behavior with measures of  
30 vascular function. Additionally, the impact of persistent versus changes in smoking behaviors on  
31 alterations in central arterial function is unclear.

### 32 **Methods and Results**

33 We assessed associations of smoking behavior and intensity with measures of central  
34 arterial hemodynamics in 6597 participants (51.5% never smoked, 34.8% formerly quit, 4.3%  
35 recent quit, and 9.3% currently smoking) of the Framingham Heart Study (N=3606 [55%]  
36 women). In cross-sectional models, central vascular measures were different across categories  
37 of smoking behavior. For example, augmentation index was higher among participants who  
38 formerly quit smoking (least squares mean±standard error=14.1±0.4%;  $P<0.001$ ) and were  
39 currently smoking (18.1±0.5%;  $P<0.001$ ) compared to participants who never smoked  
40 (12.6±0.3%). Among participants who were currently smoking, higher cigarettes per day  
41 (estimated  $B=1.41$ ; 95% CI, 0.47—2.34;  $P=0.003$ ) was associated with higher augmentation  
42 index. Among participants who had quit smoking, higher pack-years was associated with higher  
43 augmentation index (est.  $B=0.85$ ; 95% CI, 0.60—1.14) and central pulse pressure (est.  $B=0.84$ ;  
44 95% CI, 0.46—1.21). Using restricted cubic splines, we observed a negative linear association  
45 for augmentation index, but a distinct nonlinear association for characteristic impedance and  
46 central pulse pressure, with higher time since quit (all  $P<0.001$ ). In longitudinal models, we  
47 observed higher increases in augmentation index among participants who persistently quit  
48 (4.62±0.41%;  $P<0.001$ ) and persistently smoked (5.48±0.70%;  $P=0.002$ ) compared to  
49 participants who persistently never smoked (3.45±0.37%).

## 50 **Conclusion**

51 Central arterial measures are sensitive to smoking status and intensity and changes in  
52 smoking behavior. Longer smoking cessation may partially revert central arterial measures to  
53 levels comparable to those with lower smoking exposure.

54

## 55 **Introduction**

56 Cigarette smoking is a leading modifiable risk factor for cardiovascular disease (CVD) and  
57 contributes to nearly half a million deaths annually in the United States [1, 2]. Smoking duration  
58 and intensity are known to contribute to the toxicologic burden of CVD and increase disease risk  
59 [3-5]. For example, smoking contributes to a range of cardiovascular consequences, including  
60 endothelial dysfunction and inflammation, as well as conditions such as coronary artery disease,  
61 myocardial infarction, heart failure, stroke, aneurysms, and peripheral vascular disease [6].  
62 Conversely, smoking cessation is associated with reduction of morbidity and mortality and  
63 improvement to cardiovascular health [7-9]. Measures of vascular central hemodynamics and  
64 aortic stiffness are preclinical predictors of CVD events [10-14]. Several cross-sectional studies  
65 have shown inconsistent associations of smoking status and intensity with vascular  
66 hemodynamic measures that contribute to CVD that were assessed in various vascular beds  
67 [15-22]. Additionally, the impact of changes in smoking behaviors on central arterial  
68 hemodynamic measures have yet to be elucidated in well-characterized cohorts with  
69 longitudinal tracking of smoking status and comprehensive vascular hemodynamics. Thus, the  
70 putative effects of continuous and changes in smoking behavior (intensity, cessation, and  
71 relapse) on central arterial hemodynamics are not defined. We aimed to assess the cross-  
72 sectional and longitudinal associations of smoking behavior with measures of central arterial  
73 hemodynamics in samples of the Framingham Heart Study (FHS).

74

## 75 **Materials and Methods**

76 Our study followed the Strengthening the Reporting of Observational Studies in  
77 Epidemiology (STROBE) reporting guidelines [23]. The procedures for requesting data from the  
78 Framingham Heart Study can be found at <https://www.framinghamheartstudy.org/>.

## 80 **Study Sample**

81 The study samples were drawn from the Framingham FHS Offspring, New Offspring  
82 Spouses, Generation 3, Omni 1, and Omni 2 cohorts, which have been described in detail  
83 previously [24-26]. Participants who attended examinations when both smoking data and  
84 measures of vascular function were reliably collected for the index examination visit and a  
85 follow-up visit were eligible for this investigation (examinations 8 [08-03-2005 to 25-01-2008]  
86 and 9 [11-04-2011 to 24-04-2014] for Offspring; examinations 2 [27-05-2008 to 14-03-2011] and  
87 3 [11-04-2016 to 30-04-2019] for New Offspring Spouses, Generation 3, and Omni 2; and  
88 examinations 3 [02-02-2007 to 10-01-2008] and 4 [24-08-2011 to 24-03-2014] for Omni 1). 7119  
89 participants were eligible for this investigation at the index examination visit. We excluded 522  
90 due to missing data or a quit history of less than 1 year (among participants who reported  
91 quitting) to censor for unsuccessful quit attempts and relapses. Three participants with  
92 inconsistent self-reported smoking behavior were classified among those with missing smoking  
93 data. At follow-up, 1243 participants were further excluded due to loss to follow-up, death, or  
94 missing smoking data. All protocols were approved by the Boston University Medical Center's  
95 Institutional Review Board, and all participants provided written informed consent.

## 97 **Smoking Status and Intensity**

98 At each examination, participants were categorized by smoking status based on their  
99 responses to a self-report questionnaire. We defined currently smoking as smoking regularly  
100 within 12 months of each respective examination. We defined smoking cessation (or quitting)  
101 behavior for participants who 1) responded “no” when asked if they smoke cigarettes regularly  
102 in the last year; 2) responded “no” when asked if they were currently smoking (as of 1 month  
103 ago); 3) indicated current or regular smoking at a prior visit; and 4) provided an age if they have  
104 stopped smoking completely. To better capture the effects of smoking cessation, we further  
105 categorized participants by their quit history as recently quit (participants who reported regular  
106 cigarette use at prior visits but had quit by the index examination visit) and formerly quit  
107 (participants who reported no regular cigarette use at or before the visit prior to the index  
108 examination visit) based on responses given for the questionnaire. We defined “never smoked”  
109 when participants reported never having smoked. Participants who were currently smoking and  
110 those who quit were asked their age when they started smoking, cigarettes smoked per day  
111 when smoking or when they smoked, and age at quitting (if smoking ceased). For these  
112 questions, we assessed smoking duration, cumulative pack years, and years since quitting.  
113 Using the same questionnaire, we assessed change in smoking status between the two exam  
114 cycles for longitudinal analyses.

115

## 116 **Hemodynamic assessment with arterial tonometry**

117 Hemodynamic assessment with arterial tonometry and pulsed doppler electrocardiography  
118 was performed as previously described [27, 28]. We obtained non-invasive arterial tonometry  
119 with simultaneous electrocardiography from supine participants for the brachial, radial, femoral,  
120 and carotid arteries using a custom tonometer. During the tonometric assessment of the carotid  
121 artery, we performed pulsed Doppler of the left ventricular outflow tract to assess aortic flow. We  
122 digitized and transferred tonometric data and Doppler electrocardiography data to a core

123 laboratory (Cardiovascular Engineering, Inc., Norwood, MA) for blinded analyses. We signal-  
124 averaged and synchronized tonometry waveforms using the electrocardiographic R-wave and  
125 then calculated mean arterial pressure (MAP) as the integral of the signal-averaged brachial  
126 pressure tonometry waveform [28]. We estimated pulse wave velocities from tonometry  
127 waveforms and body surface measurements that adjusted for parallel transmission in the aortic  
128 arch and brachiocephalic artery as previously described [29]. We calculated the carotid-femoral  
129 pulse wave velocity (CFPWV), carotid-brachial pulse wave velocity, and carotid-radial pulse  
130 wave velocity as the ratios of the adjusted transit distance and the pulse transit time difference  
131 between carotid and the femoral, brachial, and radial sites, respectively. We calculated the  
132 pulse wave velocity ratio as the CFPWV divided by the carotid-brachial pulse wave velocity. We  
133 calculated central pulse pressure as the difference between carotid systolic and diastolic blood  
134 pressures. We defined forward pressure wave amplitude (FWA) as the difference between  
135 pressure at the foot and at the peak of the forward pressure waveform by performing time  
136 domain wave separation analysis using central pressure and flow [30]. The global reflection  
137 coefficient was defined as backward wave amplitude divided by FWA. We calculated  
138 augmentation index (AI) as the fraction of central pulse pressure attributable to late systolic  
139 pressure. Characteristic impedance was calculated in the time domain as the ratio of the  
140 pressure increase and the flow increase during the time interval between flow onset and 95% of  
141 peak flow [30].

142

## 143 **Clinical evaluation and covariates**

144 Medical history was acquired, and a physical examination was performed routinely at each  
145 examination visit. Age, sex, use of antihypertensive and hyperlipidemia medications, and CVD  
146 history were assessed through questionnaires. Height (meters) and weight (kilograms) were  
147 assessed during the examination. Body mass index was calculated as weight in kilograms

148 divided by height in meters squared. Heart rate and blood pressures were assessed during  
149 tonometry. Serum cholesterol levels were measured from fasting blood test. Criteria for diabetes  
150 were a fasting glucose level of  $\geq 126$  mg/dL (7.0 mmol/L) or treatment with insulin or an oral  
151 hypoglycemic agent.

152

## 153 **Statistical analysis**

154 We tabulated characteristics for the study sample. CFPWV was inverted to limit  
155 heteroscedasticity, then multiplied by  $-1000$  to convert units to ms/m and rectify the  
156 directionality of associations with aortic stiffness. We selected covariates *a priori* as follows:  
157 age, age<sup>2</sup>, sex, cohort, body mass index, heart rate, mean arterial pressure, total to high-density  
158 lipoprotein cholesterol ratio, triglycerides, prevalent CVD, lipid-lowering medication use,  
159 hypertension treatment, and prevalent diabetes. The triglycerides variable was natural  
160 logarithmically transformed to normalize its skewed distribution. To maximize sample sizes, we  
161 excluded participants missing individual tonometry measures on an analysis-by-analysis basis.

162 In cross-sectional analyses, we used multivariable linear regression models to relate  
163 smoking status (currently smoking, formerly quit, recently quit, and never smoked) with central  
164 arterial hemodynamic measures. The never smoked group was the reference group. We  
165 estimated least squares means based on regression models with central arterial hemodynamic  
166 measures as dependent variables and smoking status groups as independent variables,  
167 adjusting for the above-mentioned covariates. In secondary analyses, we used multivariable  
168 linear regression models to relate smoking status with peripheral arterial hemodynamic  
169 measures. To assess the association of smoking intensity among participants who ever  
170 smoked, we used multivariable linear regression models to relate cigarettes per day (among  
171 participants who were currently smoking) and pack-years (among participants who had quit

172 smoking) with central arterial measures. We estimated multivariable-adjusted nonlinear relations  
173 of time since quit with central arterial measures using restricted cubic splines.

174 For longitudinal analyses, we calculated change from the index examination visit to the  
175 follow-up exam in central arterial measures for each of the groups as follows: persistently never  
176 smoked, persistently quit, recently quit, and persistently smoking. Participants in a change in  
177 smoking status group with a low sample size were excluded from the analysis. We assessed the  
178 association of changes of central arterial measures with smoking status in the longitudinal  
179 sample using multivariable linear regression adjusted for the aforementioned covariates and  
180 central arterial hemodynamic values at the index examination visit. We estimated least squares  
181 means based on regression models with change in vascular measures as dependent variables  
182 and smoking status groups as independent variables, adjusting for the above-mentioned  
183 covariates. All analyses were performed with SAS version 9.4 for Windows (SAS Institute, Cary,  
184 NC). Bonferroni-adjusted, 2-sided *P* values were used to assess statistical significance.

185

## 186 **Results**

187 We included 6597 participants (3606 [55%] women) in the analyses. A flow diagram for the  
188 analysis samples is presented in Fig 1, and clinical characteristics and arterial hemodynamic  
189 measures of the study participants stratified by smoking category at the index examination visit  
190 are presented in Table 1 and S1 Table, respectively. Participants with a shorter quit history  
191 (recently quit) had a median time since quit of 3.2 years, and participants with a longer quit  
192 history (formerly quit) had a median time since quit of 23.1 years.

193

194 **Fig 1. Flow diagram of the Framingham Heart Study cohorts comprising the analytic**  
195 **samples**

196



197 **Table 1. Clinical characteristics at the index examination visit.**

| <b>Variable</b>                         | <b>Overall<br/>N=6597</b> | <b>Never<br/>Smoked<br/>N=3399</b> | <b>Formerly<br/>Quit<br/>N=2299</b> | <b>Recently<br/>Quit<br/>N=284</b> | <b>Currently<br/>Smoking<br/>N=615</b> |
|-----------------------------------------|---------------------------|------------------------------------|-------------------------------------|------------------------------------|----------------------------------------|
| Age, y                                  | 55.3±13.1                 | 52.7±13.2                          | 60.4±12.0                           | 52.2±12.3                          | 52.2±11.6                              |
| Women, n (%)                            | 3606 (55)                 | 1888 (56)                          | 1246 (54)                           | 153 (54)                           | 319 (52)                               |
| Body mass index, kg/m <sup>2</sup>      | 28.0±5.6                  | 27.8±5.6                           | 28.4±5.4                            | 29.4± 5.7                          | 27.6±6.0                               |
| Heart rate, beats per minute            | 63±10                     | 62±10                              | 62±10                               | 64±10                              | 66±10                                  |
| Mean arterial pressure, mm Hg           | 92±13                     | 91±13                              | 94±12                               | 92±13                              | 91±12                                  |
| Total-to-HDL cholesterol ratio          | 3.4±1.1                   | 3.4±1.1                            | 3.4±1.0                             | 3.6±1.2                            | 3.7±1.3                                |
| Triglycerides, mg/dL                    | 97 [70,<br>136]           | 94 [68,<br>131]                    | 98 [72,<br>137]                     | 106 [74,<br>159]                   | 104 [76,<br>147]                       |
| Prevalent cardiovascular disease, n (%) | 557 (8)                   | 174 (5)                            | 288 (13)                            | 36 (13)                            | 59 (10)                                |
| Lipid-lowering medications, n (%)       | 1825 (28)                 | 765 (23)                           | 833 (36)                            | 77 (27)                            | 150 (24)                               |
| Prevalent hypertension, n (%)           | 2502 (38) <sup>a</sup>    | 1106 (33)                          | 1096 (48)                           | 102 (36)                           | 198 (32)                               |
| Hypertension treatment, n (%)           | 2046 (31)                 | 899 (26)                           | 918 (40)                            | 78 (28)                            | 151 (25)                               |
| Prevalent diabetes, n (%)               | 600 (9)                   | 250 (7)                            | 276 (12)                            | 29 (10)                            | 45 (7)                                 |
| Age of smoking initiation, y            | 17.7±3.8 <sup>b</sup>     | ---                                | 17.7±3.7                            | 18.0±4.2                           | 17.3±4.0                               |
| Smoking duration, y                     | 21.0±13.5 <sup>b</sup>    | ---                                | 17.1±11.5                           | 26.9±13.5                          | 32.9±12.7                              |
| Cumulative pack-years, y                | 20.7±20.3 <sup>b</sup>    | ---                                | 17.6±18.3                           | 22.0±22.7                          | 31.7±22.4                              |
| Years since quitting                    | 22.5±12.3 <sup>c</sup>    | ---                                | 24.8±11.1                           | 4.2±3.3                            | ---                                    |

|                       |                       |     |     |     |          |
|-----------------------|-----------------------|-----|-----|-----|----------|
| Cigarettes per day, n | 13.5±9.4 <sup>d</sup> | --- | --- | --- | 13.5±9.4 |
|-----------------------|-----------------------|-----|-----|-----|----------|

198 HDL, high-density lipoprotein. Values are mean±standard deviation, number (%), or median

199 [25th, 75th percentile].

200 <sup>a</sup>N=6595.

201 <sup>b</sup>N ranges from 3058 to 3195.

202 <sup>c</sup>N=2582.

203 <sup>d</sup>N=612.

204

205 We present comparisons of least squares means estimates of central arterial hemodynamic  
 206 measures according to smoking status at Visit 1 in Table 2. Compared to participants who never  
 207 smoked, participants who formerly quit and were currently smoking had higher augmentation  
 208 index. Participants who formerly quit had higher mean global reflection coefficient, and  
 209 participants who were currently smoking had higher mean central pulse pressure, global  
 210 reflection coefficient, and peak aortic flow rate compared to those who never smoked. We  
 211 observed no significant cross-sectional differences for other central vascular measures by  
 212 smoking status. We present comparisons of least squares means estimates of peripheral  
 213 arterial hemodynamic measures according to smoking status at Visit 1 in S2 Table. Compared  
 214 to participants who never smoked, participants who were currently smoking had lower carotid-  
 215 brachial pulse wave velocity. We observed no significant cross-sectional differences for other  
 216 peripheral vascular measures by smoking status.

217

218 **Table 2. Estimated least squares means of central arterial hemodynamic measures**  
 219 **according to smoking status at Visit 1.**

| Outcome Variable | Never Smoked | Formerly Quit | Recently Quit | Currently Smoking |
|------------------|--------------|---------------|---------------|-------------------|
|------------------|--------------|---------------|---------------|-------------------|

|                                                    |                         |                      |                     |                      |
|----------------------------------------------------|-------------------------|----------------------|---------------------|----------------------|
| Augmentation index, %                              | 12.6±0.3<br>(reference) | 14.1±0.4<br>(<0.001) | 14.5±0.7<br>(0.003) | 18.1±0.5<br>(<0.001) |
| niCFPWV, ms/m                                      | -128±1<br>(reference)   | -128±1<br>(0.58)     | -127±1<br>(0.49)    | -130±1 (0.05)        |
| Central pulse pressure, mm Hg                      | 61.5±0.4<br>(reference) | 62.3±0.5<br>(0.02)   | 63.4±0.9<br>(0.01)  | 64.8±0.7<br>(<0.001) |
| Forward pressure wave, mmHg                        | 51.8±0.4<br>(reference) | 51.9±0.4<br>(0.95)   | 52.8±0.8<br>(0.17)  | 52.3±0.6<br>(0.33)   |
| Characteristic impedance, dyne•sec/cm <sup>5</sup> | 223±2<br>(reference)    | 219±2<br>(0.04)      | 216±4<br>(0.10)     | 215±3 (0.01)         |
| Global reflection coefficient, %                   | 36.1±0.2<br>(reference) | 36.7±0.2<br>(<0.001) | 36.4±0.4<br>(0.49)  | 38.1±0.3<br>(<0.001) |
| Peak aortic flow rate, mL/sec                      | 307±2<br>(reference)    | 308±2<br>(0.38)      | 317±4<br>(0.004)    | 316±3<br>(<0.001)    |

220 niCFPWV, negative inverse carotid-femoral pulse wave velocity. We present least squares  
 221 means estimates±standard deviation (*P*) based on regression models. Participants who formerly  
 222 quit, recently quit, and were currently smoking are compared to participants who never smoked.  
 223 Bonferroni-adjusted *P* values (*P*=0.05/21=0.0024) were used to assess significance of  
 224 associations. Multivariable models adjusted for age, age<sup>2</sup> sex, cohort, body mass index,  
 225 tonometry heart rate, mean arterial pressure, total to high-density lipoprotein cholesterol ratio,  
 226 triglycerides, prevalent cardiovascular disease, lipid-lowering medication use, hypertension  
 227 treatment, and prevalent diabetes.

228  
 229 We present multivariable cross-sectional associations of central arterial hemodynamic  
 230 measures with surrogates of smoking intensity in Table 3. Among participants who were

231 currently smoking, higher cigarettes per day (estimated  $B=1.41$ ; 95% CI, 0.47—2.34;  $P=0.003$ )  
 232 was associated with higher augmentation index but was not associated with other central  
 233 arterial measures. Among participants who had quit smoking, higher pack-years was associated  
 234 with higher augmentation index (est.  $B=0.85$ ; 95% CI, 0.60—1.14) and central pulse pressure  
 235 (est.  $B=0.84$ ; 95% CI, 0.46—1.21) but was not associated with other central arterial measures.  
 236 Fig 2 depicts multivariable-adjusted restricted cubic splines plots of the relations of time since  
 237 quit with select central arterial hemodynamic measures. We observed a steep, linear negative  
 238 association for augmentation index ( $P<0.001$ ) with higher time since quit. However, we  
 239 observed distinct nonlinear associations of time since quit with characteristic impedance  
 240 ( $P<0.001$ ) and central pulse pressure ( $P<0.001$ ). Among participants with shorter quit history,  
 241 characteristic impedance was similar, but we observed progressively higher characteristic  
 242 impedance after 25 years of smoking cessation. Among participants with shorter quit history,  
 243 central pulse pressure was progressively lower until after 25 years of smoking cessation when  
 244 central pulse pressure was progressively higher among those with longer quit history.

245

246 **Table 3. Multivariable cross-sectional associations of central arterial hemodynamic**  
 247 **measures with smoking intensity at Visit 1.**

| Outcome Variable              | Cigarettes per day <sup>a</sup> |       | Pack-years <sup>b</sup> |        |
|-------------------------------|---------------------------------|-------|-------------------------|--------|
|                               | Est. B (95% CI)                 | P     | Est. B (95% CI)         | P      |
| Augmentation index, %         | 1.41 (0.47, 2.34)               | 0.003 | 0.85 (0.60, 1.14)       | <0.001 |
| niCFPWV, ms/m                 | 0.18 (-1.44, 1.79)              | 0.83  | 0.59 (0.06, 1.13)       | 0.03   |
| Central pulse pressure, mm Hg | 0.38 (-0.75, 1.51)              | 0.51  | 0.84 (0.46, 1.21)       | <0.001 |
| Forward pressure wave, mm Hg  | 0.20 (-0.80, 1.20)              | 0.70  | 0.33 (0.00, 0.66)       | 0.06   |

|                                                    |                          |      |                          |      |
|----------------------------------------------------|--------------------------|------|--------------------------|------|
| Characteristic impedance, dyne•sec/cm <sup>5</sup> | -1.33 (-6.89, 4.22)      | 0.64 | -0.90 (-2.85, 1.04)      | 0.36 |
| Global reflection coefficient, %                   | 0.0006 (-0.0044, 0.0056) | 0.81 | 0.0015 (-0.0001, 0.0032) | 0.06 |
| Peak aortic flow rate, mL/sec                      | 3.52 (-1.48, 8.52)       | 0.17 | 1.37 (-0.24, 2.98)       | 0.09 |

248 CFPWV, carotid-femoral pulse wave velocity. niCFPWV, negative inverse carotid-femoral pulse  
 249 wave velocity. Regression estimates (*B*) in native units followed by the standard error (95% CI,  
 250 confidence interval) and *P* values. Bonferroni-adjusted *P* values ( $P=0.05/14=0.0036$ ) were used  
 251 to assess significance of associations. All continuous outcome variables expressed as change  
 252 per standard deviation of the independent variables. All models were adjusted for age, age<sup>2</sup> sex,  
 253 cohort, body mass index, tonometry heart rate, mean arterial pressure, total to high-density  
 254 lipoprotein cholesterol ratio, triglycerides, prevalent cardiovascular disease, lipid-lowering  
 255 medication use, hypertension treatment, and prevalent diabetes.

256 <sup>a</sup>Assessed among participants who were currently smoking.

257 <sup>b</sup>Assessed among participants who had quit smoking; models were further adjusted for time  
 258 since quit.

259

260 **Fig 2. Multivariable-adjusted spline illustrates the associations of time since quit with**  
 261 **central arterial hemodynamic measures.** Restricted cubic splines (red solid lines) with 95%  
 262 confidence intervals (dotted lines) derived from associating time since quit with (A)  
 263 augmentation index, (B) negative inverse carotid-femoral pulse wave velocity (niCFPWV), (C)  
 264 characteristic impedance, and (D) central pulse pressure. The x-axis ranges from currently  
 265 smoking (minimum) to never smoked (maximum), and the values captured among participants  
 266 who have quit based on time since smoking cessation. We placed knots at the 25<sup>th</sup>, 50<sup>th</sup>, and  
 267 100<sup>th</sup> percentiles of the distribution of time since quit. All models were adjusted for age, age<sup>2</sup>,  
 268 sex, cohort, body mass index, heart rate, mean arterial pressure, total to high-density lipoprotein

269 cholesterol ratio, triglycerides, prevalent cardiovascular disease, lipid-lowering medication use,  
 270 hypertension treatment, and prevalent diabetes. *P* for overall association is <0.001 for  
 271 augmentation index; 0.07 for niCFPWV; <0.001 for characteristic impedance; and <0.001 for  
 272 central pulse pressure. *P* for non-linearity is 0.08 for augmentation index; 0.93 for niCFPWV;  
 273 and 0.02 for characteristic impedance; and <0.001 for central pulse pressure.

274

275 We present a comparison of least squares means estimates of the longitudinal change in  
 276 central arterial hemodynamic measures between two examination visits by smoking behavior in  
 277 Table 4. We excluded participants who exhibited a change in smoking status with low sample  
 278 sizes (never smoked to quit, never smoked to currently smoking, and quit to currently smoking).  
 279 Compared to participants who persistently never smoked, participants who persistently quit and  
 280 persistently smoked had higher increases in augmentation index. Changes in smoking behavior  
 281 were not associated with longitudinal change in other arterial hemodynamic measures. We  
 282 present the observed (unadjusted) values of central arterial hemodynamic measures between  
 283 two visits for the longitudinal sample in S3 Table.

284

285 **Table 4. Longitudinal change in central arterial hemodynamic measures between two**  
 286 **examination visits by smoking behavior.**

| <b>Outcome Variable</b> | <b>Persistently<br/>Never Smoked</b> | <b>Persistently<br/>Quit</b> | <b>Recently<br/>Quit</b> | <b>Persistently<br/>Smoking</b> |
|-------------------------|--------------------------------------|------------------------------|--------------------------|---------------------------------|
| Augmentation index, %   | 3.45±0.37<br>(reference)             | 4.62±0.41<br>(<0.001)        | 4.78±0.83<br>(0.09)      | 5.48±0.70<br>(0.002)            |
| niCFPWV, ms/m           | 11.34±0.63<br>(reference)            | 11.58±0.69<br>(0.63)         | 13.99±1.39<br>(0.04)     | 12.87±1.18<br>(0.15)            |

|                                                    |                            |                       |                       |                       |
|----------------------------------------------------|----------------------------|-----------------------|-----------------------|-----------------------|
| Central pulse pressure, mm Hg                      | 4.41±0.53<br>(reference)   | 5.70±0.59<br>(0.003)  | 5.47±1.21<br>(0.35)   | 6.00±1.01<br>(0.09)   |
| Forward pressure wave, mm Hg                       | 1.29±0.42<br>(reference)   | 1.99±0.46<br>(0.04)   | 1.92±0.95<br>(0.49)   | 2.37±0.79<br>(0.14)   |
| Characteristic impedance, dyne•sec/cm <sup>5</sup> | 14.5±2.6<br>(reference)    | 13.9±2.9<br>(0.77)    | 12.55±5.87<br>(0.72)  | 13.60±4.90<br>(0.84)  |
| Global reflection coefficient, %                   | 0.019±0.002<br>(reference) | 0.021±0.003<br>(0.30) | 0.023±0.005<br>(0.41) | 0.018±0.004<br>(0.77) |
| Peak aortic flow rate, mL/sec                      | -20.2±1.8<br>(reference)   | -17.6±2.0<br>(0.08)   | -15.9±4.1<br>(0.26)   | -16.8±3.4<br>(0.28)   |

287 niCFPWV, negative inverse carotid-femoral pulse wave velocity. We present least squares  
 288 means estimates±standard errors (*P*) based on regression models. Participants who formerly  
 289 quit, recently quit, and were currently smoking are compared to participants who never smoked.  
 290 Bonferroni-adjusted *P* values ( $P=0.05/21=0.0024$ ) were used to assess significance of  
 291 associations. Multivariable models adjusted for age, age<sup>2</sup> sex, cohort, body mass index,  
 292 tonometry heart rate, mean arterial pressure, total to high-density lipoprotein cholesterol ratio,  
 293 triglycerides, prevalent cardiovascular disease, lipid-lowering medication use, hypertension  
 294 treatment, and prevalent diabetes, and vascular measure value at the index examination visit.  
 295 Participants with a change in smoking status of never smoked to quit, never smoked to currently  
 296 smoking, and quit to currently smoking were excluded from the analysis due to low statistical  
 297 power to resolve differences.

298

## 299 Discussion

300 We investigated the cross-sectional and longitudinal relations of smoking behavior and  
 301 intensity with measures of central arterial hemodynamics in 2 generations of the community-

302 based Framingham Heart Study. In cross-sectional models, participants who formerly quit and  
303 were currently smoking had a higher augmentation index compared to participants who never  
304 smoked. Compared to participants who never smoked, participants who currently smoked had  
305 higher mean central pulse pressure, global reflection coefficient, and peak aortic flow rate.  
306 Higher smoking intensity (cigarettes per day and pack-years) was associated with higher  
307 augmentation index and central pulse pressure. The association of smoking cessation (time  
308 since quit) with augmentation index, characteristic impedance, and central pulse pressure  
309 diminished among participants with longer duration of smoking cessation. Between exam visits,  
310 augmentation index increased more among participants who were persistently smoking and  
311 who had persistently quit smoking compared to participants who had never smoked. Central  
312 arterial hemodynamic measures, particularly indices related to central wave reflection and  
313 pressure augmentation, are sensitive to smoking status and intensity and changes in smoking  
314 behavior. Longer smoking cessation may partially restore central arterial measures to levels  
315 akin to those observed in individuals with lower smoking exposure.

316 Previous studies examining the acute and chronic effects of smoking on arterial stiffening  
317 are controversial and mixed; however, many studies consistently suggest that chronic changes  
318 in arterial hemodynamics substantially affect peripheral vessels [20, 31-42]. In a recent  
319 Gutenberg Health Cohort Study, researchers observed that smoking status and smoking  
320 intensity were positively associated with peripheral arterial stiffness and wave reflection  
321 (assessed by digital photoplethysmography and digital plethysmography, respectively) in the  
322 community [35]. Our data suggest that higher levels of central wave reflection substantially  
323 contribute to the aortic hemodynamic physiologic state in the setting of current, chronic  
324 smoking. These findings align with previous research conducted within a young, healthy sample  
325 by Mahmud and Feely, who reported higher aortic augmentation index in participants who were  
326 actively, chronically smoking compared to non-smoking participants [38, 43]. Additionally, higher  
327 smoking intensity was associated with higher central augmentation index indicating a potential



328 dose-response relation of smoking with wave reflection. In healthy, young arteries, there is a  
329 progressive increase in arterial stiffness from the highly elastic aorta to the smaller resistance  
330 arteries, which creates an impedance mismatch and partial reflection of the forward pressure  
331 wave [44, 45]. We had hypothesized that smoking may increase the peripheral arterial stiffness  
332 relative to central aortic stiffness, thereby shifting reflecting sites more proximal to the heart.  
333 Higher impedance mismatch would increase wave reflection and contribute to higher levels of  
334 wave reflection (higher augmentation index and global reflection coefficient), as reflecting sites  
335 shift more proximal to the heart among participants who ever smoked compared with  
336 participants who never smoked. However, in secondary analyses of muscular and peripheral  
337 arterial hemodynamics (S2 Table), we observed lower carotid-brachial pulse wave velocity  
338 among participants who were currently smoking compared to participants who never smoked.  
339 These results suggest that smoking-related differences in central-to-peripheral arterial  
340 impedance gradient were not the underlying factor behind our observations.

341 Smoking is known to affect vascular function and may contribute to differences and  
342 longitudinal changes in central arterial hemodynamics across smoking behaviors. Smoking-  
343 induced reactive oxygen species production leads to oxidative stress and contributes to  
344 endothelial dysfunction [46, 47], which impairs vascular tone [31, 32, 48, 49]. A hallmark of  
345 endothelial dysfunction is lower nitric oxide bioavailability, a characteristic of healthy individuals  
346 who smoke [50]. Endothelial dysfunction impairs regulation of small arteries, which can increase  
347 wave reflections from peripheral sites [51]. Our study suggests that among individuals who  
348 smoke, wave reflections return to the central aorta more prominently, raising the central  
349 pressure augmentation without significantly affecting central aortic stiffness. Kelly et al. showed  
350 that aortic augmentation index, but not aortic pulse wave velocity, is sensitive to vasoactive  
351 drugs [52], which suggest that dysregulation of vascular tone affects wave reflection  
352 independently of aortic stiffness. We observed no differences in aortic stiffness and no to  
353 modest differences in peripheral arterial stiffness across smoking behavior groups. It is likely

354 that smoking-associated differences in vascular tone regulation (in the absence of major  
355 differences in arterial stiffness) is the major contributor to higher augmentation index [53]. Thus,  
356 differential dysregulation of small arterial tone may underlie the relatively higher augmentation  
357 index (and its increase over time) in participants who have smoked compared to participants  
358 who never smoked. Indeed, multiple studies have shown that vascular endothelium-dependent  
359 relaxation [46, 54-64] and downstream microvascular function [64-68] are impaired in individuals  
360 who smoke. However, the differences and changes to measures of small and microvascular  
361 arterial function due to chronic smoking and changes in smoking behaviors warrants further  
362 investigation. In the current study, quitting smoking may gradually reduce the influence of  
363 smoking on central wave reflection, indicating that the potential effect of smoking may be  
364 partially reversible with longer periods since quitting. However, the impact of past smoking may  
365 persist, particularly with a shorter duration since quitting. This concept is underscored in the  
366 current longitudinal analysis, which showed that participants who consistently quit smoking still  
367 experienced a higher increase in central augmentation index than those who had never  
368 smoked, although the increase was less than that of individuals who continued to smoke.

369 Smoking status and smoking intensity contribute to elevated aortic pressure pulsatility. We  
370 observed higher central wave reflection and augmented central pulse pressure among  
371 participants who currently smoked compared to participants who never smoked. Similar to  
372 augmentation index, the association of smoking with central pulse pressure also demonstrated  
373 a dose-response relation. Taken together, higher pressure pulsatility and the earlier arrival of  
374 central wave reflection during systole (instead of diastole) may impair coronary perfusion [69,  
375 70]. Higher central pulse pressure increases afterload and may alter cardiac geometry  
376 maladaptively as concentric remodeling for individuals who smoke [71-75]. While the traditional  
377 view relates elevated central pressure with concentric remodeling due to pressure overload,  
378 animal studies have shown that smoking or nicotine exposure contributes to eccentric or mixed  
379 cardiovascular remodeling patterns [76-78]. Similar to the current study, Markus et al. observed

380 in two separate cohorts that participants who were currently smoking had higher mean central  
381 systolic blood pressure, augmentation index, and left ventricular mass compared to participants  
382 who did not smoke [41]. Additionally, in their longitudinal analyses, participants who were  
383 currently smoking showed a significant increase in left ventricular mass index, with both an  
384 increase in left ventricular wall thickness and end-diastolic diameter; whereas, LV end-diastolic  
385 diameter decreased among participants who did not smoke, consistent with aging-associated  
386 concentric remodeling [41]. Recently, Fried et al. showed a phenotypic shift from concentric  
387 hypertrophy to eccentric hypertrophy in nicotine-exposed, hemodynamically-stressed mice [78].  
388 Thus, higher central aortic pressure and enhanced wave reflection in the setting of smoking may  
389 contribute to eccentric remodeling and subsequent decompensation to incident CVD. Our study  
390 reveals that quitting smoking may reduce the putative effect of smoking on central pulse  
391 pressure in a non-linear pattern, so, similar to wave reflection, the higher hemodynamic burden  
392 from smoking might be partially reversed over time. Further studies that assess the mechanisms  
393 of smoking and smoking cessation on vascular dysfunction and CVD pathogenesis and  
394 prevention of CVD events are warranted.

395 Despite differences in other central arterial hemodynamic measures, aortic stiffness was  
396 similar in participants who never smoked compared to participants who ever smoked in our  
397 sample, as indicated by no significant differences in the carotid-femoral pulse wave velocity  
398 among smoking behavior groups. This observation is consistent with prior work in assessing  
399 differences in chronic smoking [19, 79, 80]. However, our observations are in contrast with other  
400 studies that assessed aortic stiffness via MRI or ultrasound methods [40, 81, 82]. For example,  
401 in the Multi-Ethnic Study of Atherosclerosis Study, researchers observed higher aortic stiffness  
402 (assessed via MRI) among participants who were currently smoking compared to participants  
403 who had quit smoking and had never smoked [40]. Assessing aortic stiffness with MRI involves  
404 calculating the change in aortic cross-sectional area with pulsatile blood flow and normalizing  
405 this by the brachial pulse pressure. This method does not directly measure the pulse wave in

406 the aorta (like arterial tonometry), which may contribute to differences between the MRI  
407 investigations and the current study. Additionally, areas of aortic calcification can interfere with  
408 the accuracy of MRI measurements, and errors in blood pressure measurements can  
409 significantly affect the aortic distensibility calculation, particularly when brachial pressures are  
410 used to estimate aortic pulse pressure [83, 84]. Although epidemiologic studies have shown that  
411 higher pulse pressure is associated with lower aortic root diameter [85-87], multiple studies  
412 show that smoking is associated with higher aortic diameter [86, 88-91].

413 A recent mechanistic study in mice revealed significant interactions between nicotine  
414 exposure and hypertension on aortic diameter and cross-sectional area consistent with  
415 eccentric remodeling of the aorta [76]. A transition from concentric to eccentric remodeling may  
416 reflect the ongoing adaptation of the aorta to fluctuating and evolving physiological demands  
417 and stressors due to smoking. The higher cross-sectional area in individuals who chronically  
418 smoke is consistent with our observation of higher peak aortic flow rates in currently smoking  
419 participants compared to participants who never smoked. Additionally, we observed a significant  
420 non-linear association of time since quitting smoking and characteristic impedance, suggesting  
421 a threshold effect after about 25 years. While carotid-femoral pulse wave velocity shows limited  
422 sensitivity to changes in aortic diameter, characteristic impedance demonstrates a high degree  
423 of sensitivity to variations in the aortic diameter [92]. Considering the inverse relation of  
424 characteristic impedance with aortic cross-sectional area, our observations suggest that a  
425 relatively longer period of smoking cessation could partially reverse the smoking-induced effects  
426 on characteristic impedance. Smoking also increases blood viscosity [93-95], which raises  
427 characteristic impedance. However, blood viscosity has limited direct effect on characteristic  
428 impedance, which is dominated by inertial rather than viscous effects [96]. Additionally,  
429 Shimada et al. reported that blood viscosity was markedly reduced in only a few months after  
430 smoking cessation [97]. Given that we observed differences in characteristic impedance only  
431 after an extended period of smoking cessation, it appears that the probable recovery of

432 characteristic impedance may be attributed to changes in aortic structure rather than to  
433 restoration of blood viscosity. However, future observational and animal experimental research  
434 is needed to provide further insight into the effect of smoking and smoking cessation on central  
435 arterial hemodynamics and vascular remodeling.

436

## 437 **Limitations**

438 Our study has limitations that should be considered. Although we were able to establish a  
439 temporal relation in our longitudinal analyses, the observational nature of the study limits causal  
440 inference. The gold standard for establishing causality is randomized, blinded placebo-  
441 controlled trials, but studying smoking exposures as a randomized study in humans would be  
442 unethical. Additionally, we cannot dismiss the possibility of residual confounding by unknown or  
443 unmeasured factors. We used self-reported smoking data, and cotinine levels were not  
444 measured in FHS, preventing us from validating smoking behaviors, which may lead to  
445 misclassification of participants who underreport or inaccurately recall or report their smoking  
446 behaviors. In particular, time since quitting and the amount of smoking may be misclassified.  
447 We did not account for e-cigarettes, cigars, and hookah (waterpipe or shisha) or cannabis use;  
448 therefore, our study may underestimate the total tobacco and smoking exposure of the  
449 participants. In the longitudinal analyses, participants with a change in smoking status of never  
450 smoked to quit (n=3), never smoked to currently smoking (n=5), and quit to currently smoking  
451 (n=41) were excluded from the analysis due to low statistical power to resolve differences.  
452 Although our sample includes participants of the Omni 1 and Omni 2 cohorts from  
453 underrepresented racial and ethnic groups, most participants were White individuals of  
454 European ancestry; therefore, our findings may not be generalizable to other ethnic or racial  
455 groups. Similarly, our sample comprised middle-aged to older participants, so our findings may  
456 not be generalizable to younger individuals.

457

## 458 **Conclusion**

459       We examined the cross-sectional and longitudinal relations of smoking behavior and  
460 intensity with central arterial hemodynamic measures in middle-aged to older participants of the  
461 Framingham Heart Study. Our results suggest that smoking is associated with increases in  
462 relative wave reflection, aortic pressure pulsatility, and aortic flow, with associations more  
463 pronounced among those who are currently smoking and have smoked compared to those who  
464 never smoked, with higher levels among those with greater smoking intensity. However, longer  
465 smoking cessation may be associated with reduced relations over time, indicating a potential  
466 restoration of vascular function toward levels observed in individuals who never smoked.  
467 Relative wave reflection notably was associated with continuing to smoke or quitting compared  
468 to those who never smoked after one exam cycle, emphasizing the association of smoking and  
469 cessation on central arterial function in a relatively short time. Our study underscores the  
470 connection between smoking and cessation on central arterial hemodynamics, highlighting the  
471 sensitivity of vascular function to smoking behaviors and intensity.

472

## 473 **Acknowledgements**

474       We thank the Framingham Heart Study of the National Heart Lung and Blood Institute of  
475 the National Institutes of Health and Boston University Chobanian and Avedisian School of  
476 Medicine. We thank Dr. Kathryn Barger whose expertise in statistical analysis profoundly  
477 enhanced the quality of this research.

478

## 479 **References**

- 480 1. Benjamin EJ, Blaha MJ, Chiuve SE, Cushman M, Das SR, Deo R, et al. Heart disease and  
481 stroke statistics-2017 update: a report from the American Heart Association. *Circulation*.  
482 2017;135(10):e146-e603. Epub 20170125. doi: 10.1161/CIR.0000000000000485.
- 483 2. Martin SS, Aday AW, Almarzooq ZI, Anderson CAM, Arora P, Avery CL, et al. 2024 heart  
484 disease and stroke statistics: a report of US and global data from the American Heart  
485 Association. *Circulation*. 2024;149(8):e347-e913. Epub 20240124. doi:  
486 10.1161/CIR.0000000000001209.
- 487 3. United States. Public Health Service. Office of the Surgeon General. The health  
488 consequences of smoking--50 years of progress : a report of the surgeon general. Rockville,  
489 MD: U.S. Department of Health and Human Services, Public Health Service, Office of the  
490 Surgeon General; 2014. 2 volumes p.
- 491 4. Lubin JH, Couper D, Lutsey PL, Woodward M, Yatsuya H, Huxley RR. Risk of  
492 cardiovascular disease from cumulative cigarette use and the impact of smoking intensity.  
493 *Epidemiology*. 2016;27(3):395-404. doi: 10.1097/EDE.0000000000000437.
- 494 5. Al Rifai M, DeFilippis AP, McEvoy JW, Hall ME, Acien AN, Jones MR, et al. The relationship  
495 between smoking intensity and subclinical cardiovascular injury: The Multi-Ethnic Study of  
496 Atherosclerosis (MESA). *Atherosclerosis*. 2017;258:119-30. Epub 20170119. doi:  
497 10.1016/j.atherosclerosis.2017.01.021.
- 498 6. Kondo T, Nakano Y, Adachi S, Murohara T. Effects of tobacco smoking on cardiovascular  
499 disease. *Circ J*. 2019;83(10):1980-5. Epub 20190829. doi: 10.1253/circj.CJ-19-0323.
- 500 7. Duncan MS, Freiberg MS, Greevy RA, Jr., Kundu S, Vasan RS, Tindle HA. Association of  
501 smoking cessation with subsequent risk of cardiovascular disease. *JAMA*. 2019;322(7):642-  
502 50. doi: 10.1001/jama.2019.10298.
- 503 8. Cole TB. Smoking cessation and reduction of cardiovascular disease risk. *JAMA*.  
504 2019;322(7):651. doi: 10.1001/jama.2019.11166.

- 505 9. Lightwood JM, Glantz SA. Short-term economic and health benefits of smoking cessation:  
506 myocardial infarction and stroke. *Circulation*. 1997;96(4):1089-96. doi:  
507 10.1161/01.cir.96.4.1089.
- 508 10. Ben-Shlomo Y, Spears M, Boustred C, May M, Anderson SG, Benjamin EJ, et al. Aortic  
509 pulse wave velocity improves cardiovascular event prediction: an individual participant meta-  
510 analysis of prospective observational data from 17,635 subjects. *J Am Coll Cardiol*.  
511 2014;63(7):636-46. Epub 20131113. doi: 10.1016/j.jacc.2013.09.063.
- 512 11. Hansen TW, Staessen JA, Torp-Pedersen C, Rasmussen S, Li Y, Dolan E, et al. Ambulatory  
513 arterial stiffness index predicts stroke in a general population. *J Hypertens*.  
514 2006;24(11):2247-53. doi: 10.1097/01.hjh.0000249703.57478.78.
- 515 12. Mitchell GF, Hwang SJ, Vasan RS, Larson MG, Pencina MJ, Hamburg NM, et al. Arterial  
516 stiffness and cardiovascular events: the Framingham Heart Study. *Circulation*.  
517 2010;121(4):505-11. Epub 20100118. doi: 10.1161/CIRCULATIONAHA.
- 518 13. Sutton-Tyrrell K, Najjar SS, Boudreau RM, Venkitachalam L, Kupelian V, Simonsick EM, et  
519 al. Elevated aortic pulse wave velocity, a marker of arterial stiffness, predicts cardiovascular  
520 events in well-functioning older adults. *Circulation*. 2005;111(25):3384-90. Epub 20050620.  
521 doi: 10.1161/CIRCULATIONAHA.104.483628.
- 522 14. Cooper LL, Rong J, Benjamin EJ, Larson MG, Levy D, Vita JA, et al. Components of  
523 hemodynamic load and cardiovascular events: the Framingham Heart Study. *Circulation*.  
524 2015;131(4):354-61; discussion 61. doi: 10.1161/CIRCULATIONAHA.114.011357.
- 525 15. Omvik P. How smoking affects blood pressure. *Blood Press*. 1996;5(2):71-7. doi:  
526 10.3109/08037059609062111.
- 527 16. Green MS, Jucha E, Luz Y. Blood pressure in smokers and nonsmokers: epidemiologic  
528 findings. *Am Heart J*. 1986;111(5):932-40. doi: 10.1016/0002-8703(86)90645-9.
- 529 17. Hata K, Nakagawa T, Mizuno M, Yanagi N, Kitamura H, Hayashi T, et al. Relationship  
530 between smoking and a new index of arterial stiffness, the cardio-ankle vascular index, in



- 531 male workers: a cross-sectional study. *Tob Induc Dis.* 2012;10(1):11. Epub 20120728. doi:  
532 10.1186/1617-9625-10-11.
- 533 18. Tomiyama H, Hashimoto H, Tanaka H, Matsumoto C, Odaira M, Yamada J, et al.  
534 Continuous smoking and progression of arterial stiffening: a prospective study. *J Am Coll*  
535 *Cardiol.* 2010;55(18):1979-87. doi: 10.1016/j.jacc.2009.12.042.
- 536 19. Rehill N, Beck CR, Yeo KR, Yeo WW. The effect of chronic tobacco smoking on arterial  
537 stiffness. *Br J Clin Pharmacol.* 2006;61(6):767-73. doi: 10.1111/j.1365-2125.2006.02630.x.
- 538 20. Tsuru T, Adachi H, Enomoto M, Fukami A, Kumagai E, Nakamura S, et al. Augmentation  
539 index (AI) in a dose-response relationship with smoking habits in males: The Tanushimaru  
540 study. *Medicine (Baltimore).* 2016;95(51):e5368. doi: 10.1097/MD.0000000000005368.
- 541 21. Camplain R, Meyer ML, Tanaka H, Palta P, Agarwal SK, Aguilar D, et al. Smoking behaviors  
542 and arterial stiffness measured by pulse wave velocity in older adults: The Atherosclerosis  
543 Risk in Communities (ARIC) Study. *Am J Hypertens.* 2016;29(11):1268-75. Epub 20151210.  
544 doi: 10.1093/ajh/hpv189.
- 545 22. Kool MJ, Hoeks AP, Struijker Boudier HA, Reneman RS, Van Bortel LM. Short- and long-  
546 term effects of smoking on arterial wall properties in habitual smokers. *J Am Coll Cardiol.*  
547 1993;22(7):1881-6. doi: 10.1016/0735-1097(93)90773-t.
- 548 23. von Elm E, Altman DG, Egger M, Pocock SJ, Gotsche PC, Vandenbroucke JP, et al.  
549 Strengthening the reporting of observational studies in epidemiology (STROBE) statement:  
550 guidelines for reporting observational studies. *BMJ.* 2007;335(7624):806-8. doi:  
551 10.1136/bmj.39335.541782.AD.
- 552 24. Kannel WB, Feinleib M, McNamara PM, Garrison RJ, Castelli WP. An investigation of  
553 coronary heart disease in families. The Framingham offspring study. *Am J Epidemiol.*  
554 1979;110(3):281-90. Epub 1979/09/01.
- 555 25. Splansky GL, Corey D, Yang Q, Atwood LD, Cupples LA, Benjamin EJ, et al. The Third  
556 Generation Cohort of the National Heart, Lung, and Blood Institute's Framingham Heart

- 557 Study: design, recruitment, and initial examination. *Am J Epidemiol.* 2007;165(11):1328-35.  
558 doi: 10.1093/aje/kwm021.
- 559 26. Quan SF, Howard BV, Iber C, Kiley JP, Nieto FJ, O'Connor GT, et al. The Sleep Heart  
560 Health Study: design, rationale, and methods. *Sleep.* 1997;20(12):1077-85.
- 561 27. Mitchell GF, Izzo JL, Jr., Lacourciere Y, Ouellet JP, Neutel J, Qian C, et al. Omapatrilat  
562 reduces pulse pressure and proximal aortic stiffness in patients with systolic hypertension:  
563 results of the conduit hemodynamics of omapatrilat international research study. *Circulation.*  
564 2002;105(25):2955-61. doi: 10.1161/01.cir.0000020500.77568.3c.
- 565 28. Mitchell GF, Hwang SJ, Vasan RS, Larson MG, Pencina MJ, Hamburg NM, et al. Arterial  
566 stiffness and cardiovascular events: The Framingham Heart Study. *Circulation.*  
567 2010;121(4):505-11. doi: Doi 10.1161/Circulationaha.109.886655.
- 568 29. Mitchell GF, Parise H, Benjamin EJ, Larson MG, Keyes MJ, Vita JA, et al. Changes in  
569 arterial stiffness and wave reflection with advancing age in healthy men and women: the  
570 Framingham Heart Study. *Hypertension.* 2004;43(6):1239-45. Epub 2004/05/05. doi:  
571 10.1161/01.HYP.0000128420.01881.aa.
- 572 30. Mitchell GF, Wang N, Palmisano JN, Larson MG, Hamburg NM, Vita JA, et al.  
573 Hemodynamic correlates of blood pressure across the adult age spectrum: noninvasive  
574 evaluation in the Framingham Heart Study. *Circulation.* 2010;122(14):1379-86. doi:  
575 10.1161/CIRCULATIONAHA.109.914507.
- 576 31. Celermajer DS, Sorensen KE, Gooch VM, Spiegelhalter DJ, Miller OI, Sullivan ID, et al.  
577 Non-invasive detection of endothelial dysfunction in children and adults at risk of  
578 atherosclerosis. *Lancet.* 1992;340(8828):1111-5. doi: 10.1016/0140-6736(92)93147-f.
- 579 32. Lekakis J, Papamichael C, Vemmos C, Nanas J, Kontoyannis D, Stamatelopoulos S, et al.  
580 Effect of acute cigarette smoking on endothelium-dependent brachial artery dilatation in  
581 healthy individuals. *Am J Cardiol.* 1997;79(4):529-31. doi: 10.1016/s0002-9149(96)00805-3.

- 582 33. Arosio E, De Marchi S, Rigoni A, Prior M, Lechi A. Effects of smoking on cardiopulmonary  
583 baroreceptor activation and peripheral vascular resistance. *Eur J Clin Invest*.  
584 2006;36(5):320-5. doi: 10.1111/j.1365-2362.2006.01628.x.
- 585 34. Fu S, Wu Q, Luo L, Ye P. Relationships of drinking and smoking with peripheral arterial  
586 stiffness in Chinese community-dwelling population without symptomatic peripheral arterial  
587 disease. *Tob Induc Dis*. 2017;15:39. Epub 20171025. doi: 10.1186/s12971-017-0144-9.
- 588 35. Hahad O, Schmitt VH, Arnold N, Keller K, Prochaska JH, Wild PS, et al. Chronic cigarette  
589 smoking is associated with increased arterial stiffness in men and women: evidence from a  
590 large population-based cohort. *Clin Res Cardiol*. 2023;112(2):270-84. Epub 20220906. doi:  
591 10.1007/s00392-022-02092-1.
- 592 36. Kubozono T, Miyata M, Ueyama K, Hamasaki S, Kusano K, Kubozono O, et al. Acute and  
593 chronic effects of smoking on arterial stiffness. *Circ J*. 2011;75(3):698-702. Epub 20101224.  
594 doi: 10.1253/circj.cj-10-0552.
- 595 37. Failla M, Grappiolo A, Carugo S, Calchera I, Giannattasio C, Mancina G. Effects of cigarette  
596 smoking on carotid and radial artery distensibility. *J Hypertens*. 1997;15(12 Pt 2):1659-64.  
597 doi: 10.1097/00004872-199715120-00069.
- 598 38. Mahmud A, Feely J. Effect of smoking on arterial stiffness and pulse pressure amplification.  
599 *Hypertension*. 2003;41(1):183-7. doi: 10.1161/01.hyp.0000047464.66901.60.
- 600 39. Li H, Srinivasan SR, Berenson GS. Comparison of the measures of pulsatile arterial function  
601 between asymptomatic younger adult smokers and former smokers: the Bogalusa Heart  
602 Study. *Am J Hypertens*. 2006;19(9):897-901. doi: 10.1016/j.amjhyper.2006.02.004.
- 603 40. Malayeri AA, Natori S, Bahrami H, Bertoni AG, Kronmal R, Lima JA, et al. Relation of aortic  
604 wall thickness and distensibility to cardiovascular risk factors (from the Multi-Ethnic Study of  
605 Atherosclerosis [MESA]). *Am J Cardiol*. 2008;102(4):491-6. Epub 20080524. doi:  
606 10.1016/j.amjcard.2008.04.010.

- 607 41. Markus MR, Stritzke J, Baumeister SE, Siewert U, Baulmann J, Hannemann A, et al. Effects  
608 of smoking on arterial distensibility, central aortic pressures and left ventricular mass. *Int J*  
609 *Cardiol.* 2013;168(3):2593-601. Epub 20130415. doi: 10.1016/j.ijcard.2013.03.045.
- 610 42. Sassalos K, Vlachopoulos C, Alexopoulos N, Gialernios T, Aznaouridis K, Stefanadis C. The  
611 acute and chronic effect of cigarette smoking on the elastic properties of the ascending  
612 aorta in healthy male subjects. *Hellenic J Cardiol.* 2006;47(5):263-8.
- 613 43. Chami HA, Diab M, Zaouk N, Arnaout S, Mitchell GF, Isma'eel H, et al. Central and  
614 peripheral hemodynamics in young adults who use water pipes and the acute effects of  
615 water-pipe use. *Chest.* 2023;164(6):1481-91. Epub 20230802. doi:  
616 10.1016/j.chest.2023.07.070.
- 617 44. Taylor M. Wave-travel in a non-uniform transmission line, in relation to pulses in arteries.  
618 *Phys Med Biol.* 1965:539 –50. doi:10.1088/0031-9155/10/4/308.
- 619 45. London GM, Asmar RG, O'Rourke MF, Safar ME, Investigators RP. Mechanism(s) of  
620 selective systolic blood pressure reduction after a low-dose combination of  
621 perindopril/indapamide in hypertensive subjects: comparison with atenolol. *J Am Coll*  
622 *Cardiol.* 2004;43(1):92-9. doi: 10.1016/j.jacc.2003.07.039.
- 623 46. Celermajer DS, Sorensen KE, Georgakopoulos D, Bull C, Thomas O, Robinson J, et al.  
624 Cigarette smoking is associated with dose-related and potentially reversible impairment of  
625 endothelium-dependent dilation in healthy young adults. *Circulation.* 1993;88(5 Pt 1):2149-  
626 55. doi: 10.1161/01.cir.88.5.2149.
- 627 47. Heitzer T, Just H, Munzel T. Antioxidant vitamin C improves endothelial dysfunction in  
628 chronic smokers. *Circulation.* 1996;94(1):6-9. doi: 10.1161/01.cir.94.1.6.
- 629 48. Zhang JY, Cao YX, Xu CB, Edvinsson L. Lipid-soluble smoke particles damage endothelial  
630 cells and reduce endothelium-dependent dilatation in rat and man. *BMC Cardiovasc Disord.*  
631 2006;6:3. Epub 20060119. doi: 10.1186/1471-2261-6-3.

- 632 49. Chalon S, Moreno H, Jr., Benowitz NL, Hoffman BB, Blaschke TF. Nicotine impairs  
633 endothelium-dependent dilatation in human veins in vivo. *Clin Pharmacol Ther.*  
634 2000;67(4):391-7. doi: 10.1067/mcp.2000.105153.
- 635 50. Kiowski W, Linder L, Stoschitzky K, Pfisterer M, Burckhardt D, Burkart F, et al. Diminished  
636 vascular response to inhibition of endothelium-derived nitric oxide and enhanced  
637 vasoconstriction to exogenously administered endothelin-1 in clinically healthy smokers.  
638 *Circulation.* 1994;90(1):27-34. doi: 10.1161/01.cir.90.1.27.
- 639 51. McEniery CM, Wallace S, Mackenzie IS, McDonnell B, Yasmin, Newby DE, et al.  
640 Endothelial function is associated with pulse pressure, pulse wave velocity, and  
641 augmentation index in healthy humans. *Hypertension.* 2006;48(4):602-8. Epub 20060828.  
642 doi: 10.1161/01.HYP.0000239206.64270.5f.
- 643 52. Kelly RP, Millasseau SC, Ritter JM, Chowienczyk PJ. Vasoactive drugs influence aortic  
644 augmentation index independently of pulse-wave velocity in healthy men. *Hypertension.*  
645 2001;37(6):1429-33. doi: 10.1161/01.hyp.37.6.1429.
- 646 53. Stoner L, Young JM, Fryer S. Assessments of arterial stiffness and endothelial function  
647 using pulse wave analysis. *Int J Vasc Med.* 2012;2012:903107. Epub 20120514. doi:  
648 10.1155/2012/903107.
- 649 54. Halvorsen B, Lund Sagen E, Ueland T, Aukrust P, Tonstad S. Effect of smoking cessation  
650 on markers of inflammation and endothelial cell activation among individuals with high risk  
651 for cardiovascular disease. *Scand J Clin Lab Invest.* 2007;67(6):604-11. doi:  
652 10.1080/00365510701283878.
- 653 55. Caponnetto P, Russo C, Di Maria A, Morjaria JB, Barton S, Guarino F, et al. Circulating  
654 endothelial-coagulative activation markers after smoking cessation: a 12-month  
655 observational study. *Eur J Clin Invest.* 2011;41(6):616-26. Epub 20101229. doi:  
656 10.1111/j.1365-2362.2010.02449.x.

- 657 56. Puls M, Schroeter MR, Steier J, Stijohann L, Hasenfuss G, Konstantinides S, et al. Effect of  
658 smoking cessation on the number and adhesive properties of early outgrowth endothelial  
659 progenitor cells. *Int J Cardiol.* 2011;152(1):61-9. Epub 20101120. doi:  
660 10.1016/j.ijcard.2010.07.007.
- 661 57. Umeda A, Kato T, Yamane T, Yano H, Ieiri T, Miyagawa K, et al. Does smoking cessation  
662 with varenicline worsen vascular endothelial function? *BMJ Open.* 2013;3(6). Epub  
663 20130621. doi: 10.1136/bmjopen-2013-003052.
- 664 58. Sugiura T, Dohi Y, Hirowatari Y, Yamashita S, Ohte N, Kimura G, et al. Cigarette smoking  
665 induces vascular damage and persistent elevation of plasma serotonin unresponsive to 8  
666 weeks of smoking cessation. *Int J Cardiol.* 2013;166(3):748-9. Epub 20121016. doi:  
667 10.1016/j.ijcard.2012.09.173.
- 668 59. Kato T, Umeda A, Miyagawa K, Takeda H, Adachi T, Toyoda S, et al. Varenicline-assisted  
669 smoking cessation decreases oxidative stress and restores endothelial function. *Hypertens*  
670 *Res.* 2014;37(7):655-8. Epub 20140320. doi: 10.1038/hr.2014.52.
- 671 60. Ikonomidis I, Marinou M, Vlastos D, Kourea K, Andreadou I, Liarakos N, et al. Effects of  
672 varenicline and nicotine replacement therapy on arterial elasticity, endothelial glycocalyx  
673 and oxidative stress during a 3-month smoking cessation program. *Atherosclerosis.*  
674 2017;262:123-30. Epub 20170513. doi: 10.1016/j.atherosclerosis.2017.05.012.
- 675 61. Xue C, Chen QZ, Bian L, Yin ZF, Xu ZJ, Zhang AL, et al. Effects of smoking cessation with  
676 nicotine replacement therapy on vascular endothelial function, arterial stiffness, and  
677 inflammation response in healthy smokers. *Angiology.* 2019;70(8):719-25. Epub 20190528.  
678 doi: 10.1177/0003319719853458.
- 679 62. Klonizakis M, Gumber A, McIntosh E, Brose LS. Short-term cardiovascular effects of e-  
680 cigarettes in adults making a stop-smoking attempt: a randomized controlled trial. *Biology*  
681 *(Basel).* 2021;10(11). Epub 20211119. doi: 10.3390/biology10111208.

- 682 63. Hashimoto H, Maruhashi T, Yamaji T, Harada T, Han Y, Takaeko Y, et al. Smoking status  
683 and endothelial function in Japanese men. *Sci Rep*. 2021;11(1):95. Epub 20210108. doi:  
684 10.1038/s41598-020-80012-x.
- 685 64. Ijzerman RG, Serne EH, van Weissenbruch MM, de Jongh RT, Stehouwer CD. Cigarette  
686 smoking is associated with an acute impairment of microvascular function in humans. *Clin*  
687 *Sci (Lond)*. 2003;104(3):247-52. doi: 10.1042/CS20020318.
- 688 65. Hamburg NM, Keyes MJ, Larson MG, Vasan RS, Schnabel R, Pryde MM, et al. Cross-  
689 sectional relations of digital vascular function to cardiovascular risk factors in the  
690 Framingham Heart Study. *Circulation*. 2008;117(19):2467-74. doi:  
691 10.1161/CIRCULATIONAHA.107.748574.
- 692 66. Mitchell GF, Vita JA, Larson MG, Parise H, Keyes MJ, Warner E, et al. Cross-sectional  
693 relations of peripheral microvascular function, cardiovascular disease risk factors, and aortic  
694 stiffness: the Framingham Heart Study. *Circulation*. 2005;112(24):3722-8. doi:  
695 10.1161/CIRCULATIONAHA.105.551168.
- 696 67. Gullu H, Caliskan M, Ciftci O, Erdogan D, Topcu S, Yildirim E, et al. Light cigarette smoking  
697 impairs coronary microvascular functions as severely as smoking regular cigarettes. *Heart*.  
698 2007;93(10):1274-7. Epub 20070513. doi: 10.1136/hrt.2006.100255.
- 699 68. Rossi M, Pistelli F, Pesce M, Aquilini F, Franzoni F, Santoro G, et al. Impact of long-term  
700 exposure to cigarette smoking on skin microvascular function. *Microvasc Res*. 2014;93:46-  
701 51. Epub 20140311. doi: 10.1016/j.mvr.2014.03.001.
- 702 69. Laurent S, Cockcroft J, Van Bortel L, Boutouyrie P, Giannattasio C, Hayoz D, et al. Expert  
703 consensus document on arterial stiffness: methodological issues and clinical applications.  
704 *Eur Heart J*. 2006;27(21):2588-605. Epub 20060925. doi: 10.1093/eurheartj/ehl254.
- 705 70. Vinereanu D, Nicolaidis E, Boden L, Payne N, Jones CJ, Fraser AG. Conduit arterial  
706 stiffness is associated with impaired left ventricular subendocardial function. *Heart*.  
707 2003;89(4):449-50. doi: 10.1136/heart.89.4.449.

- 708 71. Cheng S, Xanthakis V, Sullivan LM, Lieb W, Massaro J, Aragam J, et al. Correlates of  
709 echocardiographic indices of cardiac remodeling over the adult life course: longitudinal  
710 observations from the Framingham Heart Study. *Circulation*. 2010;122(6):570-8. Epub  
711 20100726. doi: 10.1161/CIRCULATIONAHA.110.937821.
- 712 72. Gidding SS, Xie X, Liu K, Manolio T, Flack JM, Gardin JM. Cardiac function in smokers and  
713 nonsmokers: the CARDIA study. The Coronary Artery Risk Development in Young Adults  
714 Study. *J Am Coll Cardiol*. 1995;26(1):211-6. doi: 10.1016/0735-1097(95)00118-j.
- 715 73. Gardin JM, Arnold A, Gottdiener JS, Wong ND, Fried LP, Klopfenstein HS, et al. Left  
716 ventricular mass in the elderly. The Cardiovascular Health Study. *Hypertension*.  
717 1997;29(5):1095-103. doi: 10.1161/01.hyp.29.5.1095.
- 718 74. Heckbert SR, Post W, Pearson GD, Arnett DK, Gomes AS, Jerosch-Herold M, et al.  
719 Traditional cardiovascular risk factors in relation to left ventricular mass, volume, and  
720 systolic function by cardiac magnetic resonance imaging: the Multiethnic Study of  
721 Atherosclerosis. *J Am Coll Cardiol*. 2006;48(11):2285-92. Epub 20061109. doi:  
722 10.1016/j.jacc.2006.03.072.
- 723 75. Nadruz W, Jr., Claggett B, Goncalves A, Querejeta-Roca G, Fernandes-Silva MM, Shah  
724 AM, et al. Smoking and cardiac structure and function in the elderly: The ARIC Study  
725 (Atherosclerosis Risk in Communities). *Circ Cardiovasc Imaging*. 2016;9(9):e004950. doi:  
726 10.1161/CIRCIMAGING.116.004950.
- 727 76. Colombo ES, Davis J, Makvandi M, Aragon M, Lucas SN, Paffett ML, et al. Effects of  
728 nicotine on cardiovascular remodeling in a mouse model of systemic hypertension.  
729 *Cardiovasc Toxicol*. 2013;13(4):364-9. doi: 10.1007/s12012-013-9217-z.
- 730 77. Zornoff LA, Matsubara LS, Matsubara BB, Okoshi MP, Okoshi K, Dal Pai-Silva M, et al.  
731 Beta-carotene supplementation attenuates cardiac remodeling induced by one-month  
732 tobacco-smoke exposure in rats. *Toxicol Sci*. 2006;90(1):259-66. Epub 20051230. doi:  
733 10.1093/toxsci/kfj080.



- 734 78. Fried ND, Oakes JM, Whitehead AK, Lazartigues E, Yue X, Gardner JD. Nicotine and novel  
735 tobacco products drive adverse cardiac remodeling and dysfunction in preclinical studies.  
736 *Front Cardiovasc Med.* 2022;9:993617. Epub 20221006. doi: 10.3389/fcvm.2022.993617.
- 737 79. Filipovsky J, Ticha M, Cifkova R, Lanska V, Stastna V, Roucka P. Large artery stiffness and  
738 pulse wave reflection: results of a population-based study. *Blood Press.* 2005;14(1):45-52.  
739 doi: 10.1080/08037050510008814.
- 740 80. Taquet A, Bonithon-Kopp C, Simon A, Levenson J, Scarabin Y, Malmejac A, et al. Relations  
741 of cardiovascular risk factors to aortic pulse wave velocity in asymptomatic middle-aged  
742 women. *Eur J Epidemiol.* 1993;9(3):298-306. doi: 10.1007/BF00146267.
- 743 81. Nakanishi N, Suzuki K, Kawashimo H, Nakamura K, Tatara K. Risk factors for the incidence  
744 of aortic stiffness by serial aortic pulse wave velocity measurement in middle-aged  
745 Japanese men. *Environ Health Prev Med.* 1998;3(3):168-74. doi: 10.1007/BF02931709.
- 746 82. Nguyen QM, Srinivasan SR, Xu JH, Chen W, Berenson GS. Racial (black-white) divergence  
747 in the association between adiponectin and arterial stiffness in asymptomatic young adults:  
748 The Bogalusa Heart Study. *Am J Hypertens.* 2008;21(5):553-7. Epub 20080221. doi:  
749 10.1038/ajh.2008.14.
- 750 83. Bianchini E, Lonnebakken MT, Wohlfahrt P, Piskin S, Terentes-Printzios D, Alastruey J, et  
751 al. Magnetic resonance imaging and computed tomography for the noninvasive assessment  
752 of arterial aging: a review by the VascAgeNet COST Action. *J Am Heart Assoc.*  
753 2023;12(10):e027414. Epub 20230515. doi: 10.1161/JAHA.122.027414.
- 754 84. Guala A, Tosello F, Leone D, Sabia L, D'Ascenzo F, Moretti C, et al. Multiscale  
755 mathematical modeling vs. the generalized transfer function approach for aortic pressure  
756 estimation: a comparison with invasive data. *Hypertens Res.* 2019;42(5):690-8. Epub  
757 20181210. doi: 10.1038/s41440-018-0159-5.
- 758 85. Vasan RS, Larson MG, Levy D. Determinants of echocardiographic aortic root size: The  
759 Framingham Heart Study. *Circulation.* 1995;91(3):734-40. doi: 10.1161/01.cir.91.3.734.

- 760 86. Agmon Y, Khandheria BK, Meissner I, Schwartz GL, Sicks JD, Fought AJ, et al. Is aortic  
761 dilatation an atherosclerosis-related process? Clinical, laboratory, and transesophageal  
762 echocardiographic correlates of thoracic aortic dimensions in the population with  
763 implications for thoracic aortic aneurysm formation. *J Am Coll Cardiol*. 2003;42(6):1076-83.  
764 doi: 10.1016/s0735-1097(03)00922-7.
- 765 87. Farasat SM, Morrell CH, Scuteri A, Ting CT, Yin FC, Spurgeon HA, et al. Pulse pressure is  
766 inversely related to aortic root diameter implications for the pathogenesis of systolic  
767 hypertension. *Hypertension*. 2008;51(2):196-202. Epub 20071224. doi:  
768 10.1161/HYPERTENSIONAHA.107.099515.
- 769 88. Chen T, Yang X, Fang X, Tang L, Zhang Y, Weng Y, et al. Potential influencing factors of  
770 aortic diameter at specific segments in population with cardiovascular risk. *BMC Cardiovasc*  
771 *Disord*. 2022;22(1):32. Epub 20220205. doi: 10.1186/s12872-022-02479-y. PubMed PMID:  
772 35120453; PubMed Central PMCID: PMCPMC8817600.
- 773 89. Lee SH, Kim YJ, Lee HJ, Kim HY, Kang YA, Park MS, et al. Comparison of CT-determined  
774 pulmonary artery diameter, aortic diameter, and their ratio in healthy and diverse clinical  
775 conditions. *PLoS One*. 2015;10(5):e0126646. Epub 20150508. doi:  
776 10.1371/journal.pone.0126646.
- 777 90. Mensel B, Hesselbarth L, Wenzel M, Kuhn JP, Dorr M, Volzke H, et al. Thoracic and  
778 abdominal aortic diameters in a general population: MRI-based reference values and  
779 association with age and cardiovascular risk factors. *Eur Radiol*. 2016;26(4):969-78. Epub  
780 20150725. doi: 10.1007/s00330-015-3926-6.
- 781 91. Wolak A, Gransar H, Thomson LE, Friedman JD, Hachamovitch R, Gutstein A, et al. Aortic  
782 size assessment by noncontrast cardiac computed tomography: normal limits by age,  
783 gender, and body surface area. *JACC Cardiovasc Imaging*. 2008;1(2):200-9. doi:  
784 10.1016/j.jcmg.2007.11.005.

- 785 92. Mitchell GF, Lacourciere Y, Ouellet JP, Izzo JL, Jr., Neutel J, Kerwin LJ, et al. Determinants  
786 of elevated pulse pressure in middle-aged and older subjects with uncomplicated systolic  
787 hypertension: the role of proximal aortic diameter and the aortic pressure-flow relationship.  
788 *Circulation*. 2003;108(13):1592-8. Epub 20030915. doi:  
789 10.1161/01.CIR.0000093435.04334.1F. PubMed PMID: 12975261.
- 790 93. Levenson J, Simon AC, Cambien F, Beretti C. [Effect of smoking on blood viscosity and  
791 arterial rigidity in normal and hypertensive subjects]. *Arch Mal Coeur Vaiss*. 1987;80(6):794-  
792 8.
- 793 94. Yarnell JW, Sweetnam PM, Rogers S, Elwood PC, Bainton D, Baker IA, et al. Some long  
794 term effects of smoking on the haemostatic system: a report from The Caerphilly and  
795 Speedwell Collaborative Surveys. *J Clin Pathol*. 1987;40(8):909-13. doi:  
796 10.1136/jcp.40.8.909.
- 797 95. Yamori Y, Kihara M, Horie R, Note S, Tsunematsu T, Fukase M. Epidemiological analysis  
798 on the mechanism of cigarette smoking as a risk factor in cardiovascular diseases. *Jpn Circ*  
799 *J*. 1980;44(12):965-70. doi: 10.1253/jcj.44.965.
- 800 96. Cho YI, Cho DJ. Hemorheology and microvascular disorders. *Korean Circ J*.  
801 2011;41(6):287-95. Epub 20110630. doi: 10.4070/kcj.2011.41.6.287.
- 802 97. Shimada S, Hasegawa K, Wada H, Terashima S, Satoh-Asahara N, Yamakage H, et al.  
803 High blood viscosity is closely associated with cigarette smoking and markedly reduced by  
804 smoking cessation. *Circ J*. 2011;75(1):185-9. Epub 20101107. doi: 10.1253/circj.cj-10-0335.

805

## 806 **Supporting information**

807 **S1 Table. Observed arterial hemodynamic measures stratified by smoking status at the**  
808 **index examination visit.** CFPWV, carotid-femoral pulse wave velocity. niCFPWV, negative

809 inverse carotid-femoral pulse wave velocity. CBPWV, carotid-brachial pulse wave velocity.  
810 CRPWV, carotid-radial pulse wave velocity. Values are mean±standard deviation or number  
811 (%).

812 **S2 Table. Estimated least squares means of peripheral arterial hemodynamic measures**  
813 **according to smoking status at Visit 1.** PWV, pulse wave velocity. We present least squares  
814 means estimates±standard deviation (*P*) based on regression models. Participants who formerly  
815 quit, recently quit, and were currently smoking are compared to participants who never smoked.  
816 Bonferroni-adjusted *P* values ( $P=0.05/12=0.0042$ ) were used to assess significance of  
817 associations. Multivariable models adjusted for age, age<sup>2</sup> sex, cohort, body mass index,  
818 tonometry heart rate, mean arterial pressure (except where mean arterial pressure is the  
819 dependent variable), total to high-density lipoprotein cholesterol ratio, triglycerides, prevalent  
820 cardiovascular disease, lipid-lowering medication use, hypertension treatment, and prevalent  
821 diabetes.

822 **S3 Table. Observed central arterial hemodynamic measures between two visits for the**  
823 **longitudinal sample.** CFPWV, carotid-femoral pulse wave velocity. niCFPWV, negative inverse  
824 carotid-femoral pulse wave velocity. Values are mean±standard deviation.

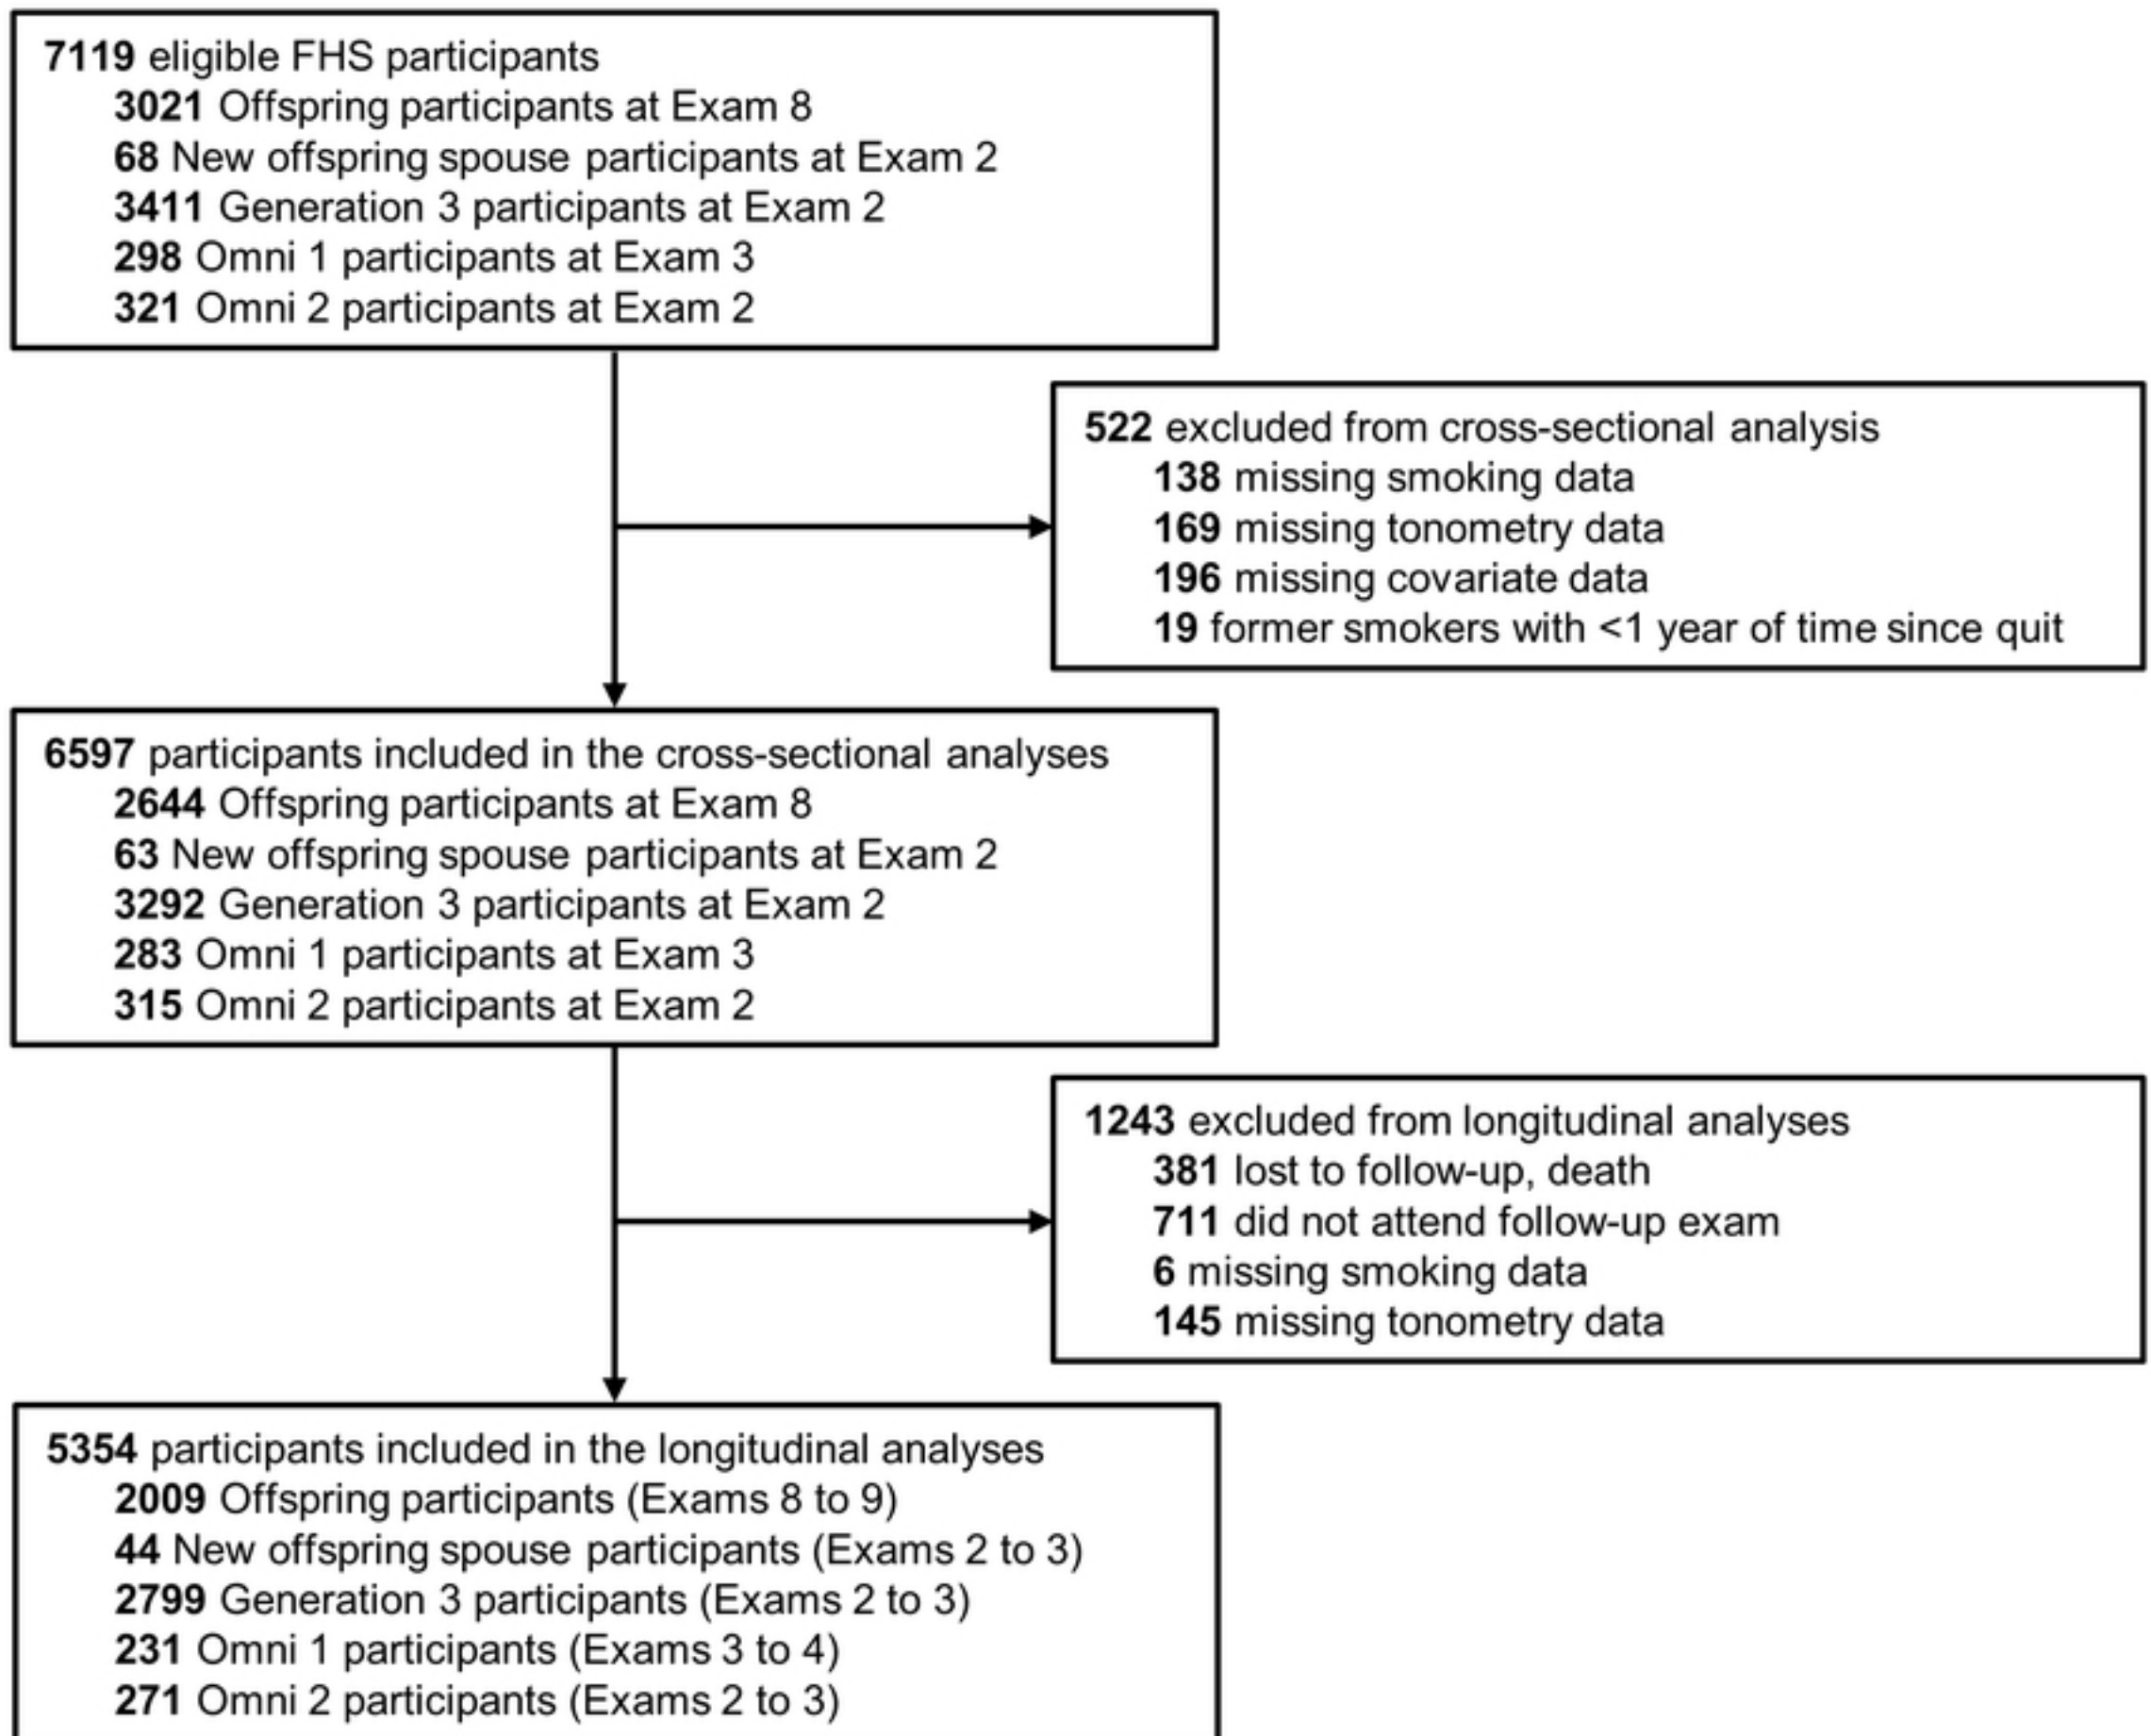

Fig 1

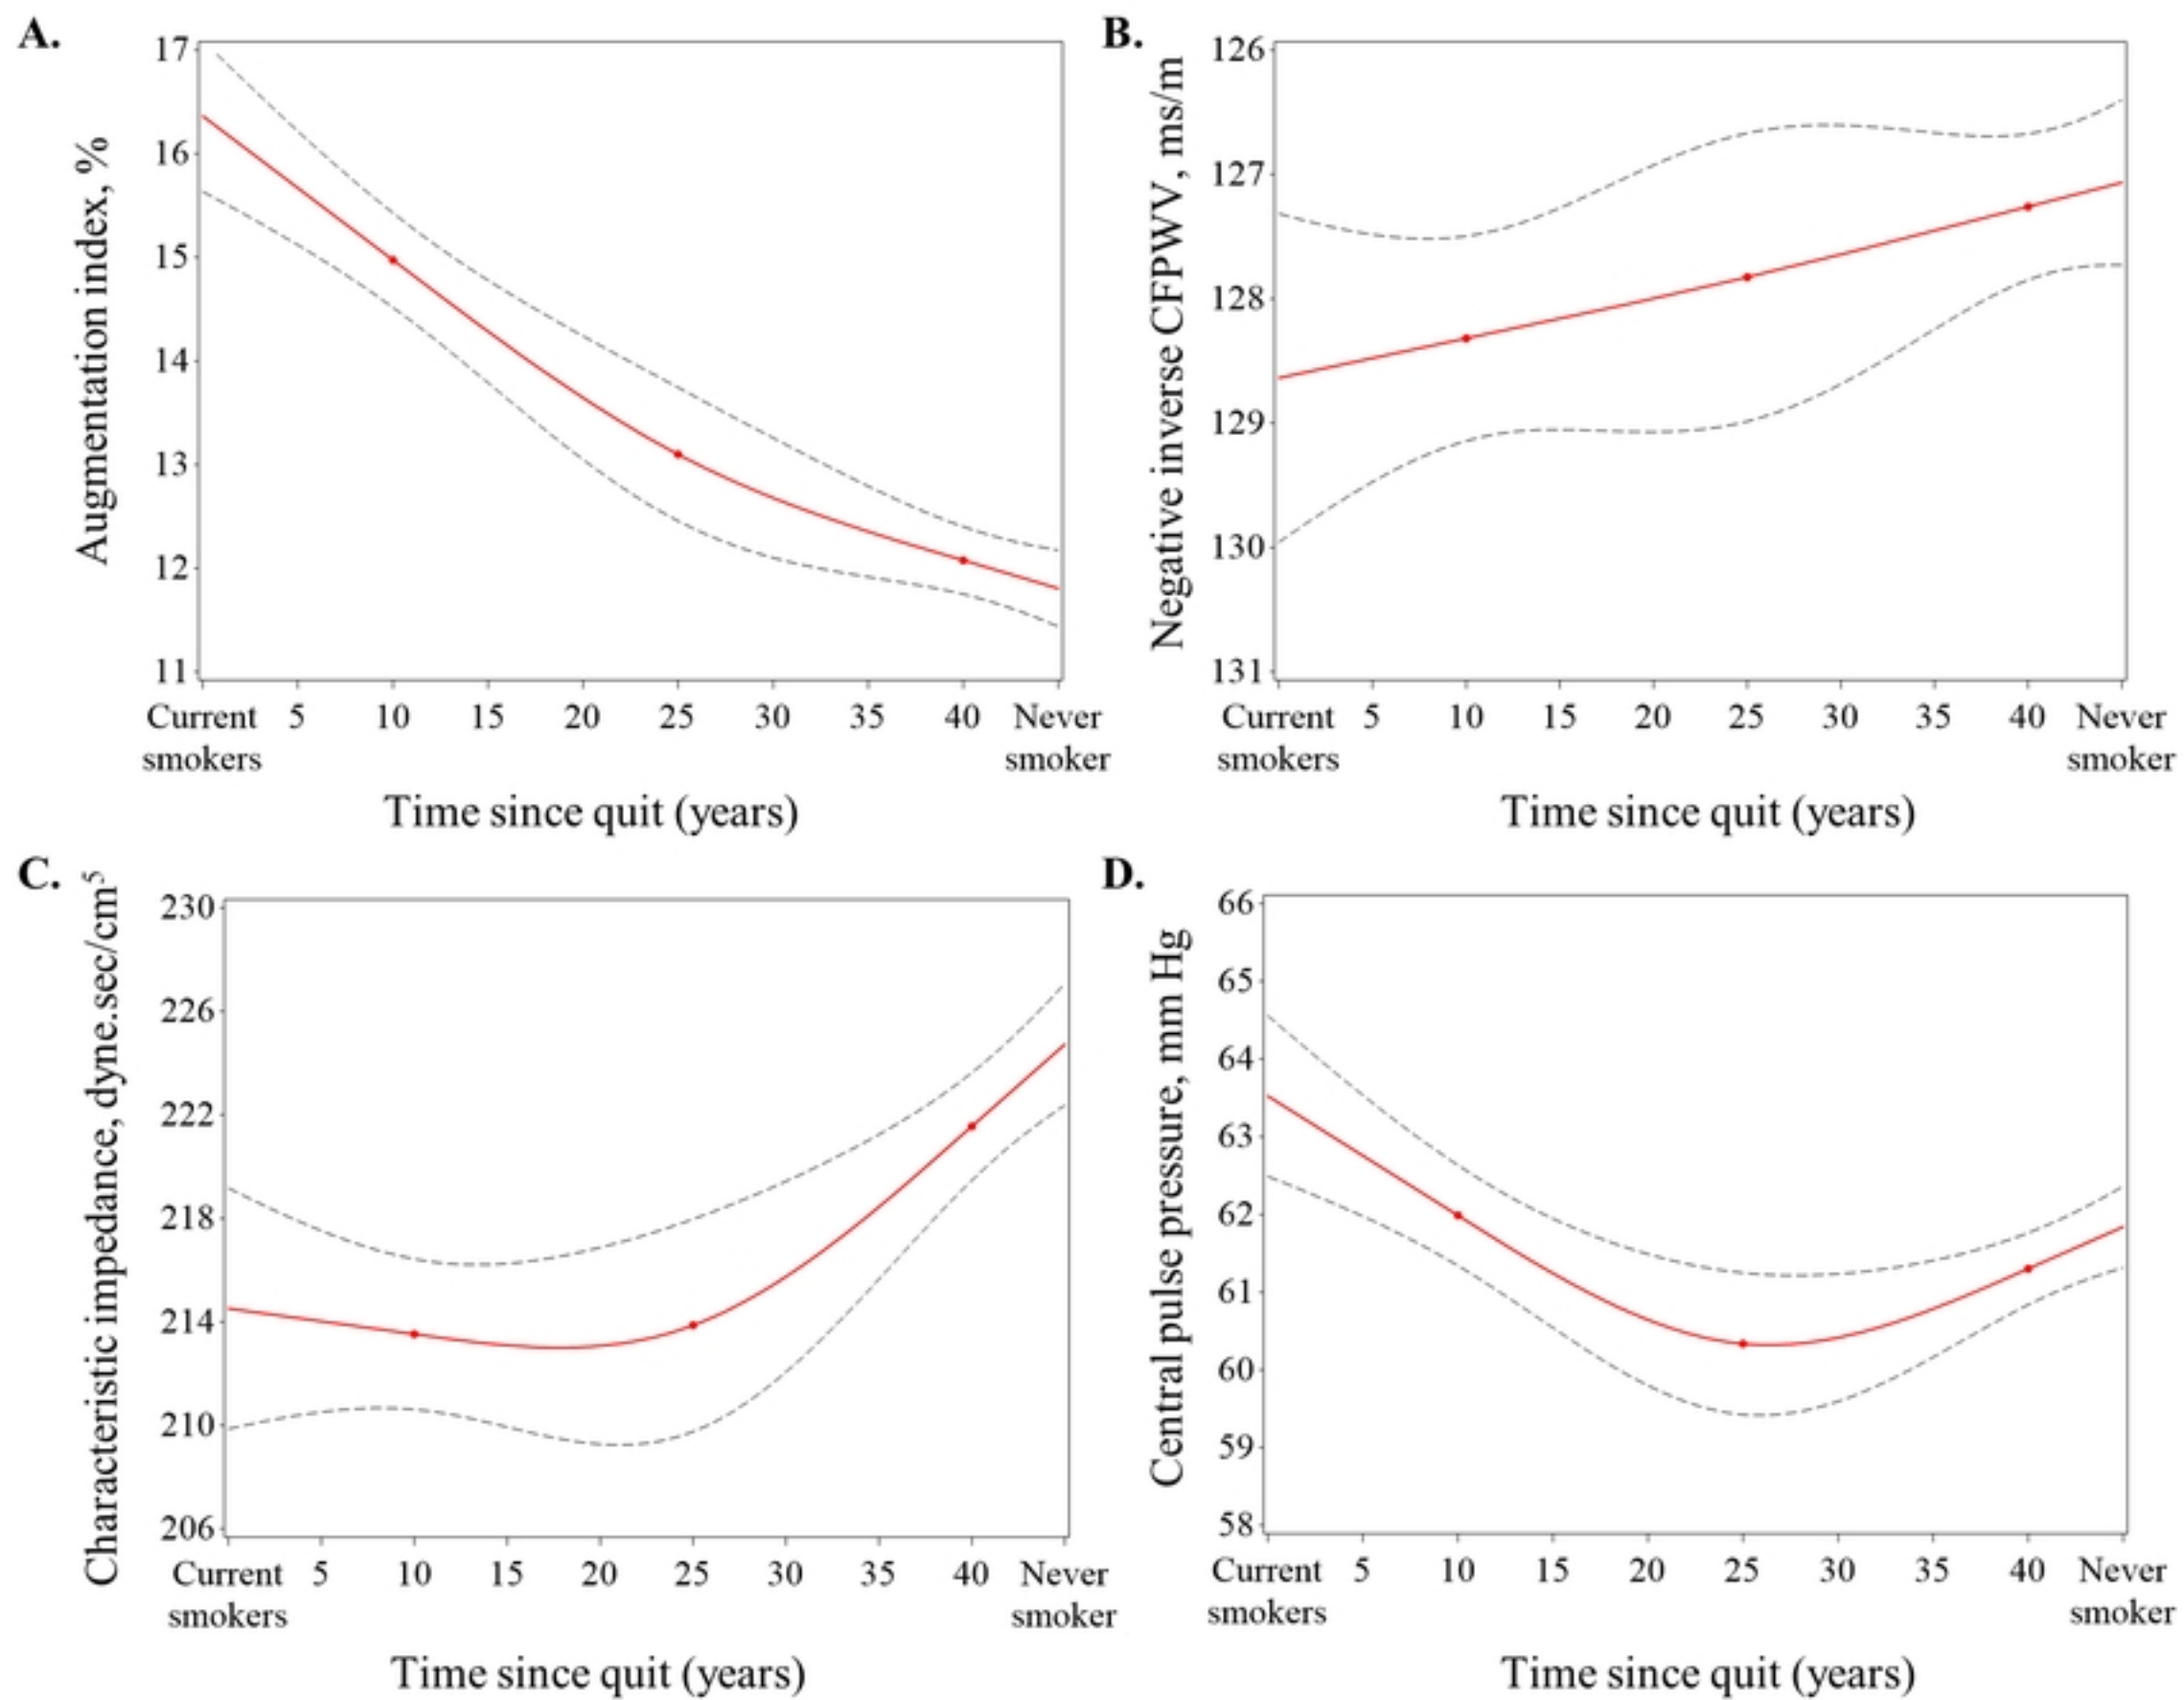

Fig 2
